# Supplementary material for: Comparative analysis of module-based versus direct methods for reverse-engineering transcriptional regulatory networks
Source: PubMed Central journal article supplement (PMC2684101; doi:10.1186/1752-0509-3-49), 2009-05-07
Supplement: 1752-0509-3-49-S3.pdf [file 1752-0509-3-49-S3.pdf]

Supplementary Figure S3 – LeMoNe network for *S. cerevisiae* at first 1070 predictions

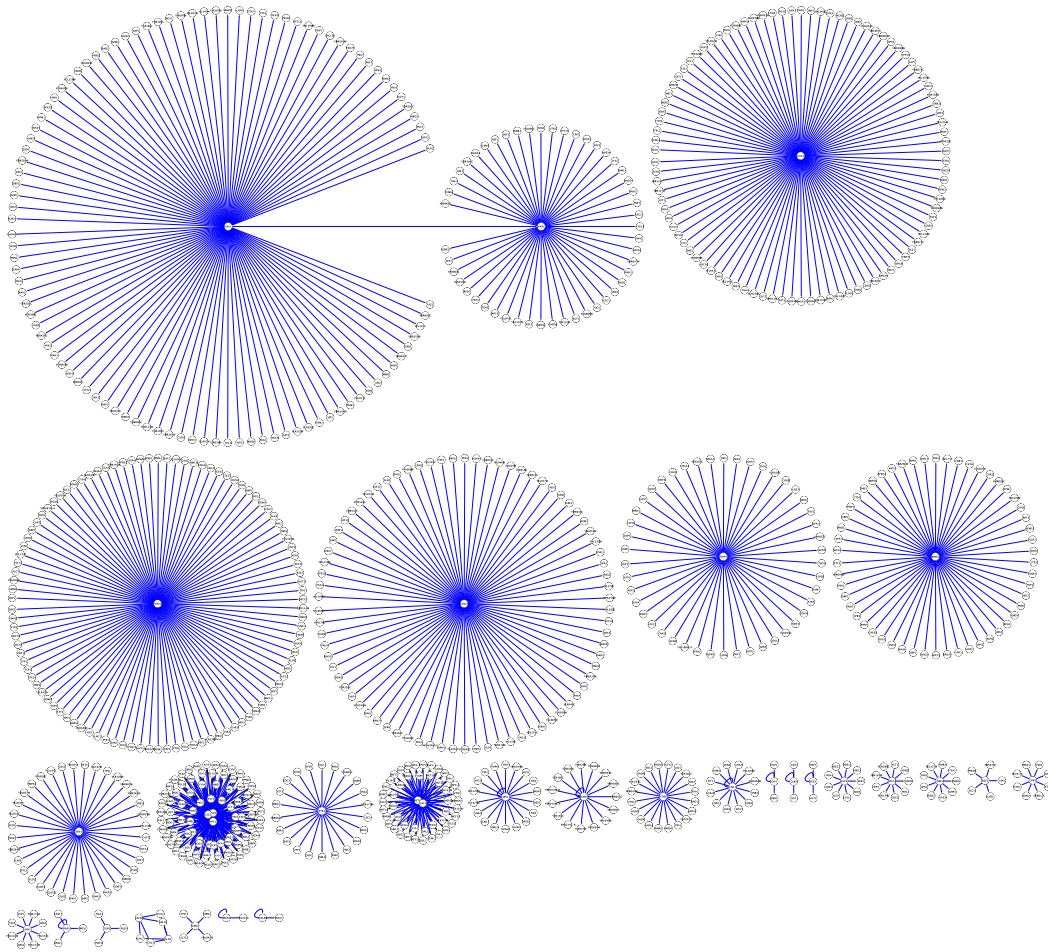

Figure S3: LeMoNe network for *S. cerevisiae* at first 1070 predictions.
