# Supplementary material for: Comparative analysis of module-based versus direct methods for reverse-engineering transcriptional regulatory networks
Source: Springer Nature journal article supplement (doi:10.1186/1752-0509-3-49), 2009-05-07
Supplement: 12918_2008_317_MOESM2_ESM.pdf [file 12918_2008_317_MOESM2_ESM.pdf]

**Supplementary Figure S2 – CLR network for *E. coli* at 30% precision cutoff**

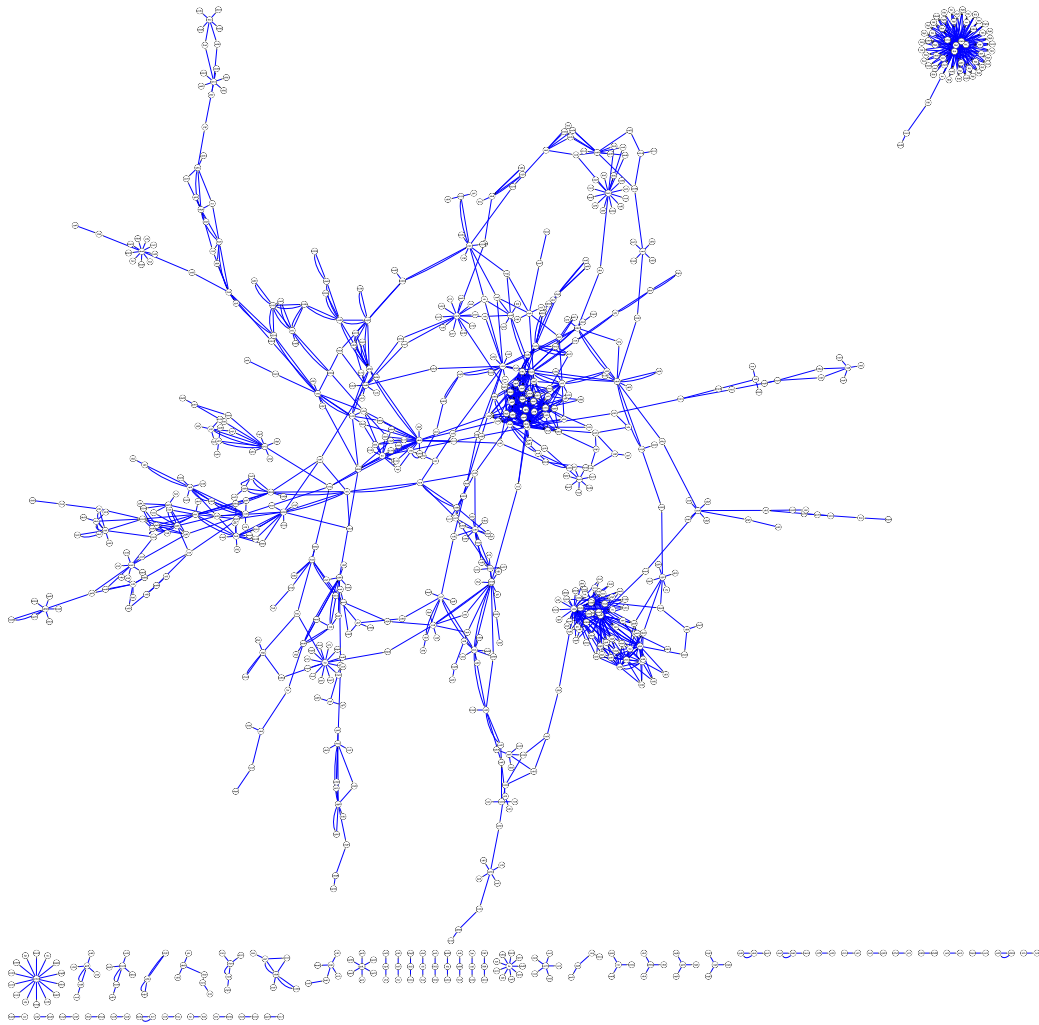

Figure S2: CLR network for *E. coli* at 30% precision cutoff.
