# Supplementary material for: Comparative analysis of module-based versus direct methods for reverse-engineering transcriptional regulatory networks
Source: Springer Nature journal article supplement (doi:10.1186/1752-0509-3-49), 2009-05-07
Supplement: 12918_2008_317_MOESM5_ESM.pdf [file 12918_2008_317_MOESM5_ESM.pdf]

## Supplementary Table S1 – New interactions predicted in the 30% precision LeMoNe network validated by literature search

| MODULE | REGULATOR | GENE        | EVIDENCE TYPE                                                                                                    | REFERENCE                                                                          |
|--------|-----------|-------------|------------------------------------------------------------------------------------------------------------------|------------------------------------------------------------------------------------|
| 5      | Lrp       | gdhA        | ChIP-qPCR                                                                                                        | Faith et al. (2007)                                                                |
| 5      | Lrp       | hisA        | microarray analysis                                                                                              | Hung et al. (2002)                                                                 |
| 5      | Lrp       | hisB        | microarray analysis                                                                                              | Hung et al. (2002)                                                                 |
| 5      | Lrp       | hisC        | microarray analysis                                                                                              | Hung et al. (2002)                                                                 |
| 5      | Lrp       | hisD        | microarray analysis                                                                                              | Hung et al. (2002)                                                                 |
| 5      | Lrp       | hisF        | microarray analysis                                                                                              | Hung et al. (2002)                                                                 |
| 5      | Lrp       | hisG        | microarray analysis                                                                                              | Hung et al. (2002)                                                                 |
| 5      | Lrp       | hisH        | microarray analysis                                                                                              | Hung et al. (2002)                                                                 |
| 5      | Lrp       | hisI        | microarray analysis                                                                                              | Hung et al. (2002)                                                                 |
| 5      | Lrp       | pntA        | ChIP-qPCR                                                                                                        | Faith et al. (2007)                                                                |
| 5      | Lrp       | pntB        | ChIP-qPCR                                                                                                        | Faith et al. (2007)                                                                |
| 5      | Lrp       | ydJ         | microarray analysis                                                                                              | Hung et al. (2002)                                                                 |
| 10     | Lrp       | aroG        | ChIP-qPCR                                                                                                        | Faith et al. (2007)                                                                |
| 10     | Lrp       | leuB        | microarray analysis (indirect influence of Lrp on expression of LeuLABC according to Landgraf et al. (1999))     | Hung et al. (2002)                                                                 |
| 10     | Lrp       | pheA        | microarray analysis                                                                                              | Hung et al. (2002)                                                                 |
| 10     | Lrp       | pheL        | microarray analysis                                                                                              | Hung et al. (2002)                                                                 |
| 10     | Lrp       | purM        | ChIP-qPCR                                                                                                        | Faith et al. (2007)                                                                |
| 10     | Lrp       | thrA        | ChIP-qPCR                                                                                                        | Faith et al. (2007)                                                                |
| 10     | Lrp       | thrB        | ChIP-qPCR                                                                                                        | Faith et al. (2007)                                                                |
| 10     | Lrp       | thrC        | ChIP-qPCR                                                                                                        | Faith et al. (2007)                                                                |
| 10     | Lrp       | yagU        | ChIP-qPCR                                                                                                        | Faith et al. (2007)                                                                |
| 14     | RpoS      | amyA        | microarray analysis                                                                                              | Weber et al. (2005)                                                                |
| 14     | RpoS      | b0753       | microarray analysis                                                                                              | Weber et al. (2005)                                                                |
| 14     | RpoS      | b1953       | microarray analysis                                                                                              | Weber et al. (2005)                                                                |
| 14     | RpoS      | b2080       | microarray analysis                                                                                              | Weber et al. (2005)                                                                |
| 14     | RpoS      | b2086       | microarray analysis                                                                                              | Weber et al. (2005)                                                                |
| 14     | RpoS      | psiF        | microarray analysis                                                                                              | Weber et al. (2005)                                                                |
| 14     | RpoS      | wrbA        | microarray analysis                                                                                              | Weber et al. (2005)                                                                |
| 14     | RpoS      | ybaT        | microarray analysis                                                                                              | Weber et al. (2005)                                                                |
| 14     | RpoS      | ybaS        | microarray analysis                                                                                              | Weber et al. (2005)                                                                |
| 14     | RpoS      | ybaY        | microarray analysis                                                                                              | Weber et al. (2005)                                                                |
| 14     | RpoS      | ycaC        | microarray analysis                                                                                              | Weber et al. (2005)                                                                |
| 14     | RpoS      | yccJ        | microarray analysis                                                                                              | Weber et al. (2005)                                                                |
| 14     | RpoS      | ycgB        | microarray analysis                                                                                              | Weber et al. (2005)                                                                |
| 14     | RpoS      | ycgZ        | microarray analysis                                                                                              | Weber et al. (2005)                                                                |
| 14     | RpoS      | yeaG        | microarray analysis                                                                                              | Weber et al. (2005)                                                                |
| 14     | RpoS      | yedU        | microarray analysis                                                                                              | Weber et al. (2005)                                                                |
| 14     | RpoS      | ygiG        | microarray analysis                                                                                              | Weber et al. (2005)                                                                |
| 14     | RpoS      | yhbO        | microarray analysis                                                                                              | Weber et al. (2005)                                                                |
| 14     | RpoS      | ymgA        | microarray analysis                                                                                              | Weber et al. (2005)                                                                |
| 14     | RpoS      | yngB        | microarray analysis                                                                                              | Weber et al. (2005)                                                                |
| 14     | RpoS      | yphA        | microarray analysis                                                                                              | Weber et al. (2005)                                                                |
| 19     | Fis       | argQ        | microarray analysis                                                                                              | Bradley et al. (2007)                                                              |
| 19     | Fis       | argV        | microarray analysis                                                                                              | Bradley et al. (2007)                                                              |
| 19     | Fis       | argZ        | microarray analysis                                                                                              | Bradley et al. (2007)                                                              |
| 19     | Fis       | dniR        | microarray analysis                                                                                              | Bradley et al. (2007)                                                              |
| 19     | Fis       | glyW        | microarray analysis                                                                                              | Bradley et al. (2007)                                                              |
| 19     | Fis       | secG        | microarray analysis                                                                                              | Bradley et al. (2007)                                                              |
| 20     | LexA      | dinD        | microarray analysis, ChIP-chip analysis                                                                          | Courcelle et al. (2002), Wade et al. (2005)                                        |
| 20     | LexA      | dinI        | microarray analysis, ChIP-chip analysis                                                                          | Courcelle et al. (2002), Wade et al. (2005)                                        |
| 20     | LexA      | yafN        | microarray analysis (co-upregulation of neighbouring ORFS, along with dinB)                                      | Courcelle et al. (2002)                                                            |
| 20     | LexA      | yafO        | microarray analysis (co-upregulation of neighbouring ORFS, along with dinB)                                      | Courcelle et al. (2002)                                                            |
| 20     | LexA      | yebF        | microarray analysis (co-upregulation of neighbouring ORFS, along with yebG)                                      | Courcelle et al. (2002)                                                            |
| 20     | LexA      | yebG        | <b>in RegulatorDBv6.1</b>                                                                                        | <b>Gama-Castro et al. (2008)</b>                                                   |
| 20     | LexA      | yigN        | functional LexA-binding site (electrophoretic gel mobility shift assay), microarray analysis, ChIP-chip analysis | Fernández de Henestrosa et al. (2000), Courcelle et al. (2002), Wade et al. (2005) |
| 20     | LexA      | yjiW        | ChIP-chip analysis                                                                                               | Wade et al. (2005)                                                                 |
| 23     | FNR       | b1341       | ChIP-chip analysis                                                                                               | Grainger et al. (2007)                                                             |
| 23     | FNR       | b1342       | ChIP-chip analysis                                                                                               | Grainger et al. (2007)                                                             |
| 23     | FNR       | ydaA        | ChIP-chip analysis                                                                                               | Grainger et al. (2007)                                                             |
| 24     | FliA      | b1742       | microarray analysis                                                                                              | Zhao et al. (2007)                                                                 |
| 24     | FliA      | b1760       | microarray analysis                                                                                              | Zhao et al. (2007)                                                                 |
| 45     | FliA      | yjzZ        | microarray-based genetic footprinting, microarray analysis                                                       | Girgis et al. (2007), Zhao et al. (2007)                                           |
| 45     | FliA      | yjzA        | microarray-based genetic footprinting, microarray analysis                                                       | Girgis et al. (2007), Zhao et al. (2007)                                           |
| 48     | GadE      | yhiD        | <b>in RegulatorDBv6.1</b>                                                                                        | <b>Gama-Castro et al. (2008)</b>                                                   |
| 48     | GadE      | yhiU        | <b>in RegulatorDBv6.1</b>                                                                                        | <b>Gama-Castro et al. (2008)</b>                                                   |
| 48     | GadE      | slp         | microarray analysis (induction by YdeO or GadE?)                                                                 | Masuda & Church (2003)                                                             |
| 48     | GadE      | yhiF        | microarray analysis (induction by YdeO or GadE?), macroarray analysis                                            | Masuda & Church (2003), Hommais et al. (2004)                                      |
| 78     | LexA      | dinP (dinB) | microarray analysis, ChIP-chip analysis                                                                          | Courcelle et al. (2002), Wade et al. (2005)                                        |

### REFERENCES

Bradley, M. D., M. B. Beach, A. P. de Koning, T. S. Pratt, and R. Osuna, 2007, *Microbiology* **153**, 2922.

Courcelle, J., A. Khodursky, B. Peter, P. O. Brown, and P. C. Hanawalt, 2001, *Genetics* **158**, 41.

Faith, J. J., B. Hayete, J. T. Thaden, I. Mogno, J. Wierzbowski, G. Cottarel, S. Kasif, J. J. Collins, and T. S. Gardner, 2007, *PLoS Biol* **5**, e8.

Fernández De Henestrosa, A. R., T. Ogi, S. Aoyagi, D. Chafin, J. J. Hayes, H. Ohmori, and R. Woodgate, 2000, *Mol Microbiol* **35**(6), 1560.

Gama-Castro, S., V. Jiménez-Jacinto, M. Peralta-Gil, A. Santos-Zavaleta, M. I. Peñalosa-Spinola, B. Contreras-Moreira, J. Segura-Salazar, L. Muñoz-Rascado, I. Martínez-Flores, H. Salgado, et al., 2008, *Nucleic Acids Res* **36**(Database Issue), D120.

Girgis, H. S., Y. Liu, W. S. Ryu, and S. Tavazoie, 2007, *PLoS Genet* **3**, e154.

Grainger, D. C., H. Aiba, D. F. Browning, and S. J. Busby, 2007, *Nucleic Acids Res* **35**, 269.

Hommais, F., E. Kiri, J. Y. Coppée, C. Lacroix, E. Yeramian, A. Danchin, and P. Bertin, 2004, *Microbiology* **150**, 61.

Hung, S. P., P. Baldi, and G. W. Hatfield, 2002, *J Biol Chem* **43**, 40309.

Karp, P. D., I. M. Keseler, A. Shearer, M. Latendresse, M. Krummenacker, S. M. Paley, I. Paulsen, J. Collado-Vides, S. Gama-Castro, M. Peralta-Gil, et al., 2007, *Nucleic Acids Res* **35**, 7577.

Landgraf, J. R., J. A. Boxer, and J. M. Calvo, 1999, *J Bacteriol* **181**(20), 6547.

Masuda, N., and G. M. Church, 2003, *Mol Microbiol* **48**(3), 699.

Wade, J. T., N. B. Reppas, G. M. Church, and K. Struhl, 2005, *Genes Dev* **19**, 2619.

Weber, H., T. Polen, J. Heuveling, V. F. Wendisch, and R. Hengge, 2005, *J Bacteriol* **187**(5), 1591.

Zhao, K., M. Liu, and R. R. Burgess, 2007, *Nucleic Acids Res* **35**, 4441.

Table S1: New interactions predicted in the 30% precision LeMoNe network validated by literature search.
