# Supplementary material for: Comparative analysis of module-based versus direct methods for reverse-engineering transcriptional regulatory networks
Source: Springer Nature journal article supplement (doi:10.1186/1752-0509-3-49), 2009-05-07

(a)

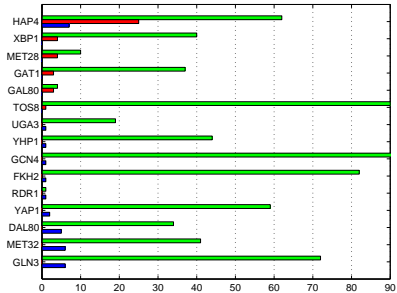

(b)

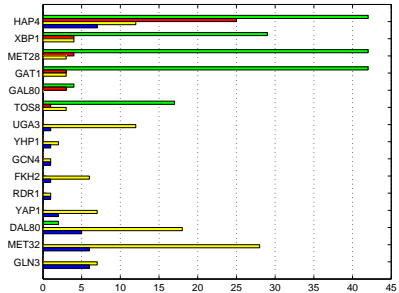

Supplement: 12918_2008_317_MOESM20_ESM.pdf [file 12918_2008_317_MOESM20_ESM.pdf]
