# Supplementary material for: Comparative analysis of module-based versus direct methods for reverse-engineering transcriptional regulatory networks
Source: Springer Nature journal article supplement (doi:10.1186/1752-0509-3-49), 2009-05-07

(a)

| Class 1      | Class 2                       | Class 3             |
|--------------|-------------------------------|---------------------|
| <i>flhDC</i> | <i>flg</i> <u>AMN</u>         | <i>fliC</i>         |
|              | <i>flg</i> <u>BCDEFGHIJKL</u> | <i>motABcheA</i>    |
|              | <i>flhBAE</i>                 | <i>tar tap cheR</i> |
|              | <i>fli</i> <u>AZY</u>         | <i>aer</i>          |
|              | <i>fli</i> <u>DST</u>         | <i>trg</i>          |
|              | <i>fliE</i>                   | <i>tsr</i>          |
|              | <i>fli</i> <u>FGHIJK</u>      |                     |
|              | <i>fli</i> <u>LMNOPQR</u>     |                     |

(b)

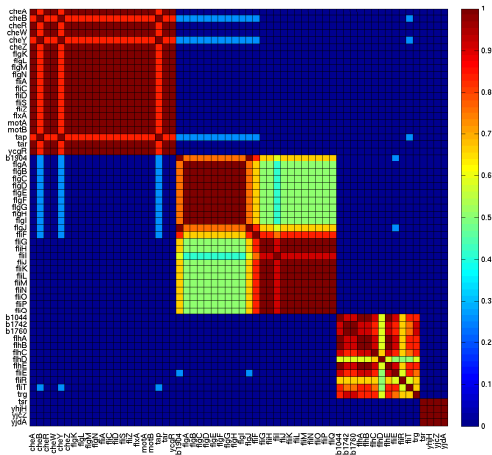

Supplement: 12918_2008_317_MOESM21_ESM.pdf [file 12918_2008_317_MOESM21_ESM.pdf]
