# Supplementary material for: Comparative analysis of module-based versus direct methods for reverse-engineering transcriptional regulatory networks
Source: Springer Nature journal article supplement (doi:10.1186/1752-0509-3-49), 2009-05-07
Supplement: 12918_2008_317_MOESM22_ESM.pdf [file 12918_2008_317_MOESM22_ESM.pdf]

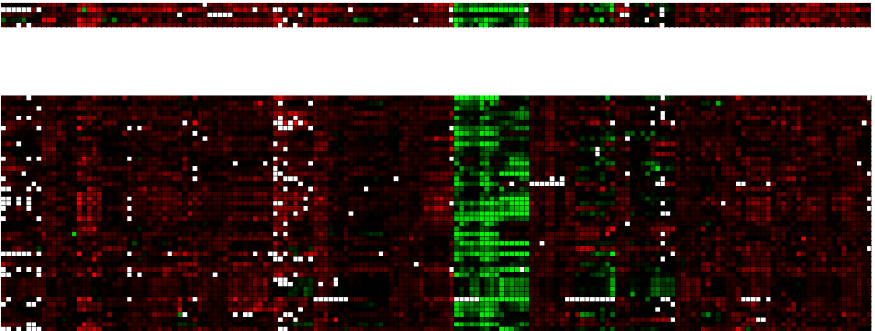

Hs00139363.g1 @ der C14-1  
 Hs00139363.g2 @ der C14-2  
 Hs00139363.g3 @ der C14-3  
 Hs00139363.g4 @ der C14-4  
 Hs00139363.g5 @ der C14-5  
 Hs00139363.g6 @ der C14-6  
 Hs00139363.g7 @ der C14-7  
 Hs00139363.g8 @ der C14-8  
 Hs00139363.g9 @ der C14-9  
 Hs00139363.g10 @ der C14-10  
 Hs00139363.g11 @ der C14-11  
 Hs00139363.g12 @ der C14-12  
 Hs00139363.g13 @ der C14-13  
 Hs00139363.g14 @ der C14-14  
 Hs00139363.g15 @ der C14-15  
 Hs00139363.g16 @ der C14-16  
 Hs00139363.g17 @ der C14-17  
 Hs00139363.g18 @ der C14-18  
 Hs00139363.g19 @ der C14-19  
 Hs00139363.g20 @ der C14-20  
 Hs00139363.g21 @ der C14-21  
 Hs00139363.g22 @ der C14-22  
 Hs00139363.g23 @ der C14-23  
 Hs00139363.g24 @ der C14-24  
 Hs00139363.g25 @ der C14-25  
 Hs00139363.g26 @ der C14-26  
 Hs00139363.g27 @ der C14-27  
 Hs00139363.g28 @ der C14-28  
 Hs00139363.g29 @ der C14-29  
 Hs00139363.g30 @ der C14-30  
 Hs00139363.g31 @ der C14-31  
 Hs00139363.g32 @ der C14-32  
 Hs00139363.g33 @ der C14-33  
 Hs00139363.g34 @ der C14-34  
 Hs00139363.g35 @ der C14-35  
 Hs00139363.g36 @ der C14-36  
 Hs00139363.g37 @ der C14-37  
 Hs00139363.g38 @ der C14-38  
 Hs00139363.g39 @ der C14-39  
 Hs00139363.g40 @ der C14-40  
 Hs00139363.g41 @ der C14-41  
 Hs00139363.g42 @ der C14-42  
 Hs00139363.g43 @ der C14-43  
 Hs00139363.g44 @ der C14-44  
 Hs00139363.g45 @ der C14-45  
 Hs00139363.g46 @ der C14-46  
 Hs00139363.g47 @ der C14-47  
 Hs00139363.g48 @ der C14-48  
 Hs00139363.g49 @ der C14-49  
 Hs00139363.g50 @ der C14-50  
 Hs00139363.g51 @ der C14-51  
 Hs00139363.g52 @ der C14-52  
 Hs00139363.g53 @ der C14-53  
 Hs00139363.g54 @ der C14-54  
 Hs00139363.g55 @ der C14-55  
 Hs00139363.g56 @ der C14-56  
 Hs00139363.g57 @ der C14-57  
 Hs00139363.g58 @ der C14-58  
 Hs00139363.g59 @ der C14-59  
 Hs00139363.g60 @ der C14-60  
 Hs00139363.g61 @ der C14-61  
 Hs00139363.g62 @ der C14-62  
 Hs00139363.g63 @ der C14-63  
 Hs00139363.g64 @ der C14-64  
 Hs00139363.g65 @ der C14-65  
 Hs00139363.g66 @ der C14-66  
 Hs00139363.g67 @ der C14-67  
 Hs00139363.g68 @ der C14-68  
 Hs00139363.g69 @ der C14-69  
 Hs00139363.g70 @ der C14-70  
 Hs00139363.g71 @ der C14-71  
 Hs00139363.g72 @ der C14-72  
 Hs00139363.g73 @ der C14-73  
 Hs00139363.g74 @ der C14-74  
 Hs00139363.g75 @ der C14-75  
 Hs00139363.g76 @ der C14-76  
 Hs00139363.g77 @ der C14-77  
 Hs00139363.g78 @ der C14-78  
 Hs00139363.g79 @ der C14-79  
 Hs00139363.g80 @ der C14-80  
 Hs00139363.g81 @ der C14-81  
 Hs00139363.g82 @ der C14-82  
 Hs00139363.g83 @ der C14-83  
 Hs00139363.g84 @ der C14-84  
 Hs00139363.g85 @ der C14-85  
 Hs00139363.g86 @ der C14-86  
 Hs00139363.g87 @ der C14-87  
 Hs00139363.g88 @ der C14-88  
 Hs00139363.g89 @ der C14-89  
 Hs00139363.g90 @ der C14-90  
 Hs00139363.g91 @ der C14-91  
 Hs00139363.g92 @ der C14-92  
 Hs00139363.g93 @ der C14-93  
 Hs00139363.g94 @ der C14-94  
 Hs00139363.g95 @ der C14-95  
 Hs00139363.g96 @ der C14-96  
 Hs00139363.g97 @ der C14-97  
 Hs00139363.g98 @ der C14-98  
 Hs00139363.g99 @ der C14-99  
 Hs00139363.g100 @ der C14-100
